# Supplementary material
Source: PubMed Central journal article supplement (PMC2096428)
Supplement: JCI0732567sd.pdf [file JCI0732567sd.pdf]

# Supplemental Figure 1

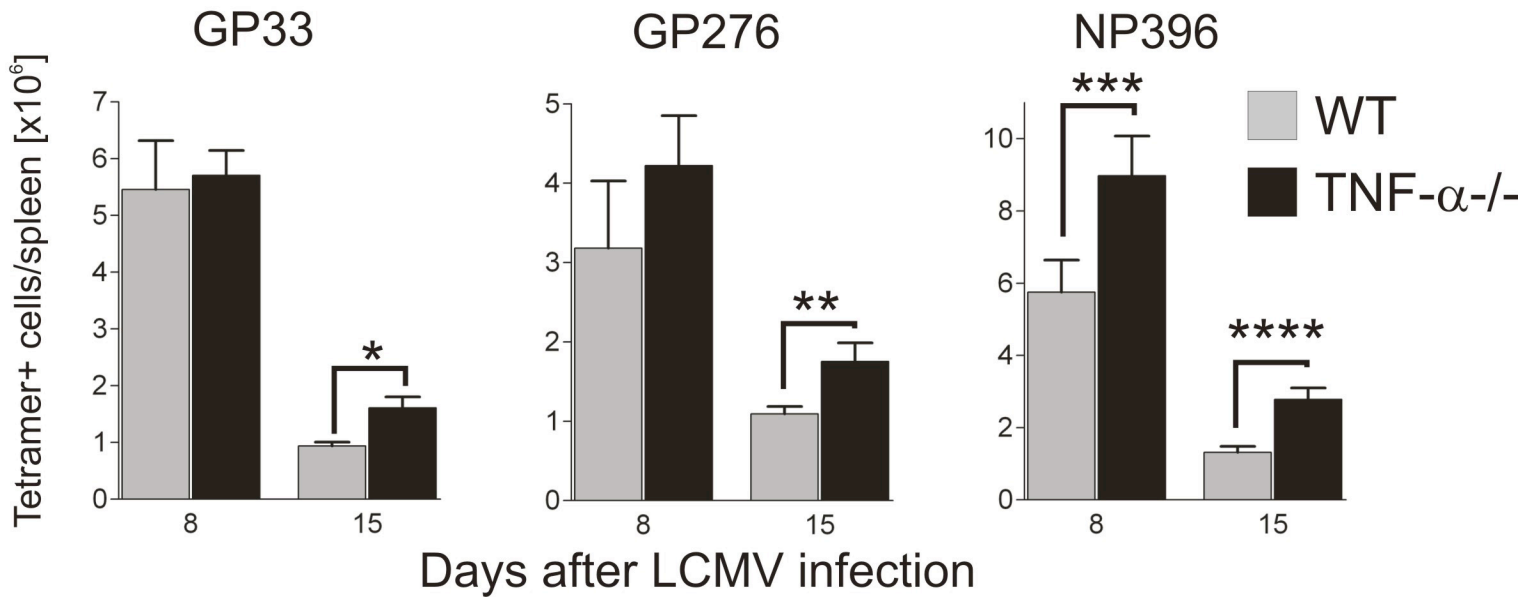

# Supplemental Figure 2

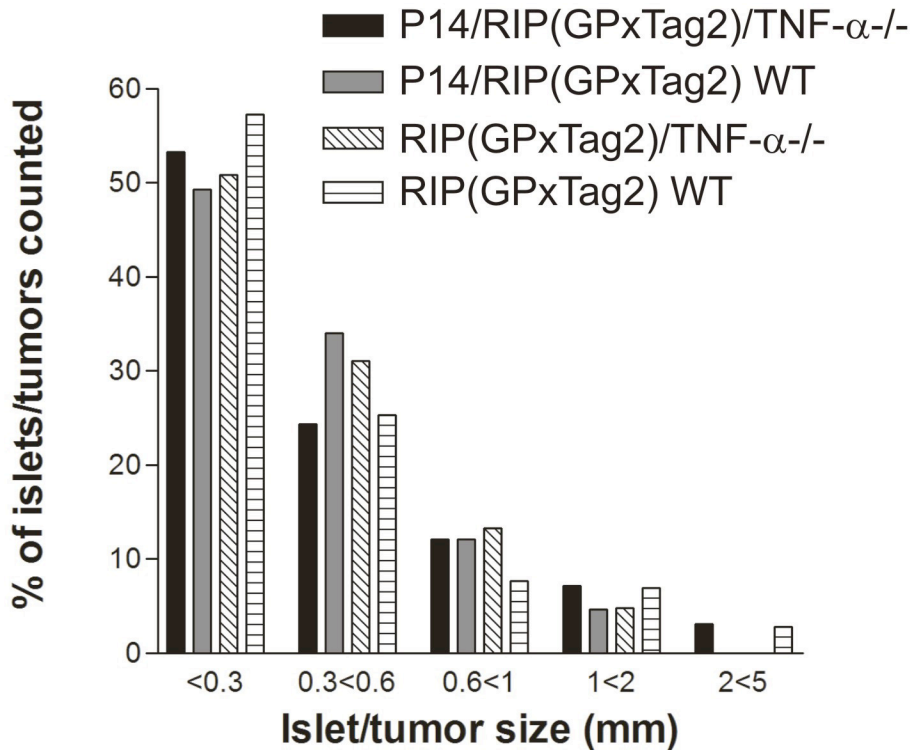

## Supplemental Figure Legend

**Supplemental Figure 1.** Number of LCMV-specific CD8 T cells in spleen of WT and TNF- $\alpha$ -/- animals following LCMV infection.

On day 8 or 15 following LCMV infection of WT or TNF- $\alpha$ -/- animals, splenic CD8 T cells GP33-, GP276- and NP396-specific were quantified by flow cytometry using MHC class I tetramers. Data show mean  $\pm$  SEM. Statistically significant values are indicated: \* $P=0.0017$ , \*\* $P=0.0096$ , \*\*\* $P=0.0336$  and \*\*\*\* $P=0.0003$ . Day 8: WT mice n=11, TNF- $\alpha$ -/- mice n=11. Day15: WT mice n=12, TNF- $\alpha$ -/- mice n=9.

**Supplemental Figure 2.** Similar islet/tumor size distribution in the pancreas of WT and TNF- $\alpha$ -/- P14/RIP(GPxTag2) and RIP(GPxTag2) animals.

Histological sections from pancreas were stained with H&E. Diameters of islets/tumors were measured on random sections of pancreas from 4 to 5 mice per group using vernier gradations on a light microscope. The number and range of islet/tumor sizes was comparable between TNF- $\alpha$  sufficient and deficient animals.
